# Supplementary material for: Intracellular Porphyromonas gingivalis Promotes the Tumorigenic Behavior of Pancreatic Carcinoma Cells
Source: PubMed Central journal article supplement (PMC7465784; doi:10.3390/cancers12082331), 2020-08-18
Supplement: cancers-12-02331-s001.pdf [file cancers-12-02331-s001.pdf]

# Intracellular *Porphyromonas gingivalis* Promotes the Tumorigenic Behavior of Pancreatic Carcinoma Cells

JebaMercy Gnanasekaran <sup>1</sup>, Adi Binder Gallimidi <sup>1,2</sup>, Elias Saba <sup>1</sup>, Karthikeyan Pandi <sup>1</sup>, Luba Eli Berchoer <sup>1</sup>, Esther Hermano <sup>2</sup>, Sarah Angabo <sup>1</sup>, Hasna'a Makkawi <sup>1</sup>, Arin Khashan <sup>1</sup>, Alaa Daoud <sup>1</sup>, Michael Elkin <sup>2,\*</sup>,† and Gabriel Nussbaum <sup>1,\*</sup>,†

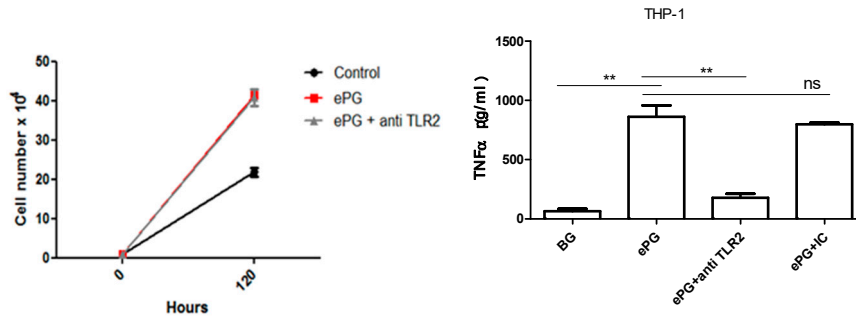

**Figure S1.** Pancreatic cancer cell proliferation induced by *P. gingivalis* is independent of TLR2. Enhanced PANC-1 proliferation induced by ePG is not inhibited by blocking TLR2 with the inhibitory T2.5 monoclonal antibody (mAb). As a control for the inhibitory activity of the T2.5 mAb, human THP-1 macrophages were treated with the T2.5 mAb vs. isotype control mAb (IC) and then stimulated with ePG overnight. Supernatants were collected and tested for TNF $\alpha$  production by ELISA (ns = nonsignificant, \*\*  $p < 0.01$ ). The T2.5 mAb inhibits macrophage stimulation by *P. gingivalis*.

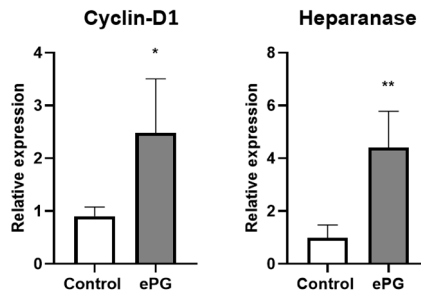

**Figure S2.** Increased expression of Cyclin-D1 and Heparanase in PANC-1 cells infected with *P. gingivalis*. PANC1 cells were grown in hypoxia, and cultured alone or infected in vitro with ePG for 24h as described in Methods. Quantitative RT-PCR was used to assess expression of Cyclin-D1 and Heparanase. \*  $p < 0.05$ , \*\*  $p < 0.01$ .

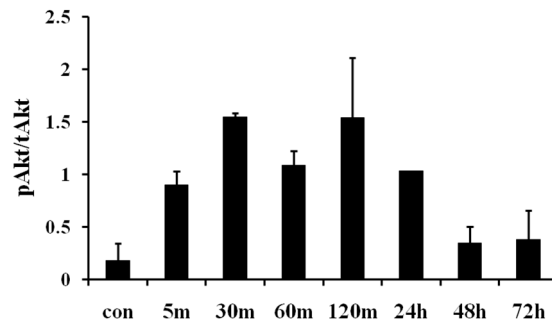

**Figure S3.** *P. gingivalis* induces sustained phospho-Akt in PANC1 cells. PANC1 cells were grown in hypoxia, infected in vitro with ePG for the times indicated, and then lysates were prepared and analyzed by western blot. Protein levels were determined by densitometry. The experiment was performed twice. Data show the mean  $\pm$  SD of the combined results of the experiments.

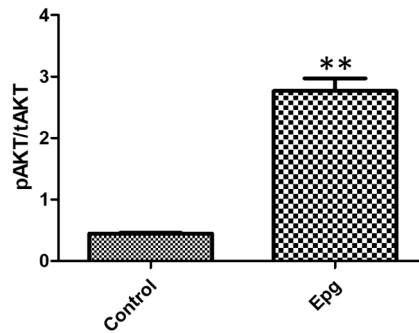

**Figure S4.** *P. gingivalis* enhances Akt phosphorylation in MIA PaCa-2 cells. MIA PaCa-2 cells were infected with ePG for 1h, treated with metronidazole and gentamicin for 1h, and then incubated for 24 h. All steps were performed in hypoxia. Cell lysates were analyzed by WB for phosphorylated and total Akt, and protein levels were determined by densitometry. The experiment was performed in duplicate. \*\*  $p = 0.0074$ .

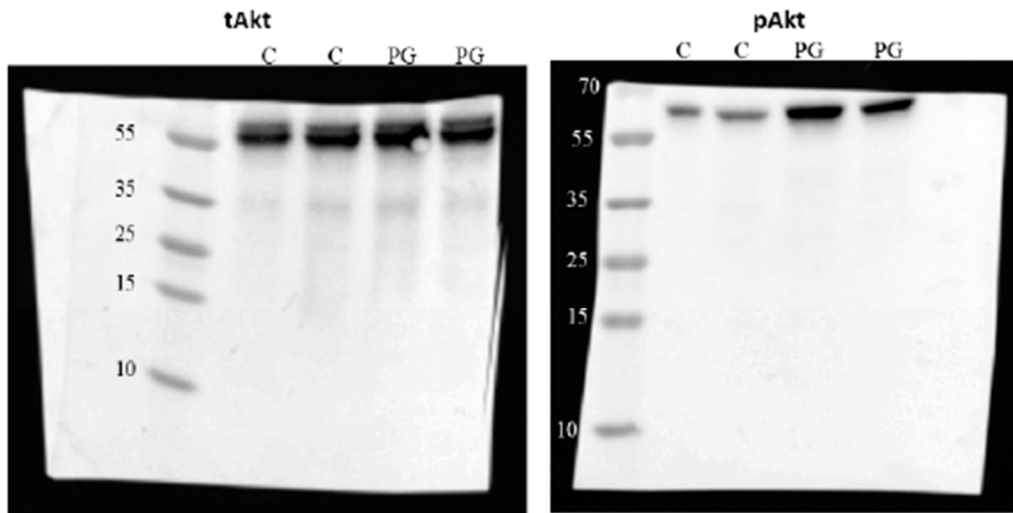

|         | pAkt     | tAkt     |
|---------|----------|----------|
| Control | 10024.05 | 25665.17 |
| Control | 13100.9  | 29155.56 |
| PG      | 36470.97 | 31197.46 |
| PG      | 28666.75 | 28115.13 |

Figure S5. Full length gels and densitometry readings for Figure 6d.

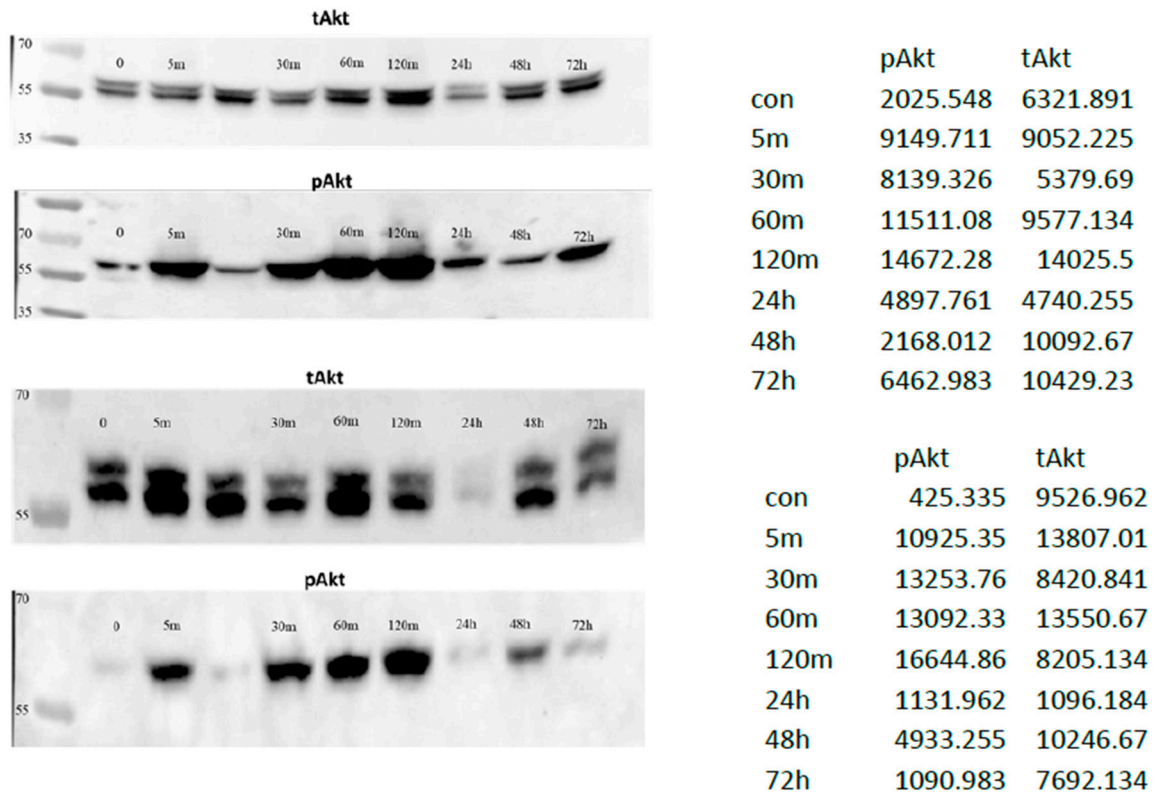

**Figure S6.** Full length gels and densitometry readings for Figure S3. (Membranes were cut prior to processing.).

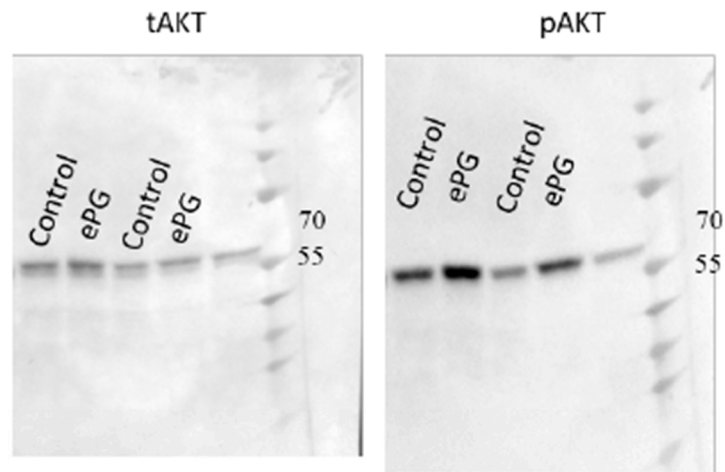

|         | pAKT    | tAKT    | ratio    |
|---------|---------|---------|----------|
| Control | 2464272 | 3155460 | 0.780955 |
| ePG     | 9520488 | 3514275 | 2.70909  |
| Control | 1236620 | 1930225 | 0.640661 |
| ePG     | 8288160 | 2702848 | 3.066454 |

**Figure S7.** Full length gels and densitometry readings for Figure S4.

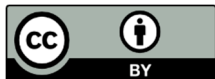

© 2020 by the authors. Licensee MDPI, Basel, Switzerland. This article is an open access article distributed under the terms and conditions of the Creative Commons Attribution (CC BY) license (<http://creativecommons.org/licenses/by/4.0/>).
